# Supplementary material for: MRL proteins cooperate with activated Ras in glia to drive distinct oncogenic outcomes
Source: PubMed Central journal article supplement (PMC5537612; doi:10.1038/onc.2017.68), 2017-03-27
Supplement: onc201768x4.pdf [file onc201768x4.pdf]

## Genotypes

- w, eyFLP; A>y>GAL4, UAS-GFP/+; UAS-HM-pico/+* (Fig.1,2,5)
- w, eyFLP; A>y>GAL4, UAS-GFP/+; UAS-Ras<sup>V12</sup>/+*
- w, eyFLP; A>y>GAL4, UAS-GFP/+; UAS-Ras<sup>V12</sup>, UAS-HM-pico/+*
- w, eyFLP; A>y>GAL4, UAS-GFP/+; UAS-Ras<sup>V12</sup>, UAS-hLpd/+*
- 
- w, eyFLP; A>y>GAL4, UAS-GFP/+; UAS-HM-pico/puc-lacZ* (Fig.3)
- w, eyFLP; A>y>GAL4, UAS-GFP/+; UAS-Ras<sup>V12</sup>/puc-lacZ*
- w, eyFLP; A>y>GAL4, UAS-GFP/+; UAS-Ras<sup>V12</sup>, UAS-HM-pico/puc-lacZ*
- w, eyFLP/UAS-DN-Bsk; A>y>GAL4, UAS-GFP/+; UAS-HM-pico/puc-lacZ*
- w, eyFLP/UAS-DN-Bsk; A>y>GAL4, UAS-GFP/+; UAS-Ras<sup>V12</sup>/puc-lacZ*
- w, eyFLP/UAS-DN-Bsk; A>y>GAL4, UAS-GFP/+; UAS-Ras<sup>V12</sup>, UAS-HM-pico/puc-lacZ*
- 
- w, eyFLP; +/+; UAS-Ras<sup>V12</sup>, UAS-HM-pico/A>CD2>GAL4,UAS-GFP* (Fig.4)
- w, eyFLP; eiger<sup>3</sup>/eiger<sup>3</sup>; UAS-Ras<sup>V12</sup>, UAS-HM-pico/A>CD2>GAL4,UAS-GFP*
- 
- w, eyFLP; +/+; UAS-Ras<sup>V12</sup>, UAS-HM-pico/A>CD2>GAL4, UAS-GFP* (Fig.6)
- w, eyFLP; +/repo-GAL80; UAS-Ras<sup>V12</sup>, UAS-HM-pico/A>CD2>GAL4, UAS-GFP*
- 
- w, eyFLP; A>y>GAL4, UAS-GFP/+* (Fig.7)
- w, eyFLP; A>y>GAL4, UAS-GFP/+; UAS-Ras<sup>V12</sup>, UAS-HM-pico/+*
- w, eyFLP; A>y>GAL4, UAS-GFP/+; UAS-Ras<sup>V12</sup>, UAS-HM-pico<sup>RA-PH</sup>*
- w, eyFLP; UAS-ena/+; A>CD2>GAL4,UAS-GFP/+*
- w, eyFLP; UAS-ena/+; UAS-Ras<sup>V12</sup>/A>CD2>GAL4,UAS-GFP*
- w, eyFLP; UAS-ena/+; UAS-Ras<sup>V12</sup>, UAS-HM-pico/A>CD2>GAL4,UAS-GFP*
- w, eyFLP; UAS-chic/+; A>CD2>GAL4,UAS-GFP/+*
- w, eyFLP; UAS-chic/+; UAS-Ras<sup>V12</sup>/A>CD2>GAL4,UAS-GFP*
- w, eyFLP; UAS-chic/+; UAS-Ras<sup>V12</sup>, UAS-HM-pico/A>CD2>GAL4,UAS-GFP*
- w, eyFLP; UAS-scar/+; A>CD2>GAL4,UAS-GFP/+*
- w, eyFLP; UAS-scar/+; UAS-Ras<sup>V12</sup>/A>CD2>GAL4,UAS-GFP*
- w, eyFLP; UAS-mal-d/+; A>CD2>GAL4,UAS-GFP/+*
- w, eyFLP; UAS-mal-d/+; UAS-Ras<sup>V12</sup>/A>CD2>GAL4,UAS-GFP*
- w, eyFLP; UAS-mal-d/+; UAS-Ras<sup>V12</sup>, UAS-HM-pico/A>CD2>GAL4,UAS-GFP*
- w, eyFLP; A>y>GAL4, UAS-GFP/+; UAS-Ras<sup>V12</sup>, UAS-HM-pico/UAS-ma<sup>DN</sup>*
- w, eyFLP; ena<sup>210</sup>/+; UAS-Ras<sup>V12</sup>, UAS-HM-pico/A>CD2>GAL4,UAS-GFP*
- w, eyFLP; chic<sup>05205</sup>/+; UAS-Ras<sup>V12</sup>, UAS-HM-pico/A>CD2>GAL4,UAS-GFP*
- w, eyFLP; UAS-Scar<sup>JR</sup>/+; UAS-Ras<sup>V12</sup>, UAS-HM-pico/A>CD2>GAL4,UAS-GFP*

We consider  $A>y>GAL4$  and  $A>CD2>GAL4$  elements used in this study to be comparable because: i) neither were able to promote invasion of  $Ras^{V12}$ -expressing cells into the ventral nerve cord; ii) both elements were capable of driving invasion of  $Ras^{V12}$  *Pico*-expressing cells, to an equivalent extent, see Fig.7.

*w, eyFLP; A>y>GAL4, UAS-GFP/+; UAS-Ras<sup>V12</sup>/+* (Fig.S1)  
*w, eyFLP; A>y>GAL4, UAS-GFP/+; UAS-Ras<sup>V12</sup>/UAS-CycD, UAS-Cdk4*

*w, ey(3.5)FLP; A>y>GAL4, UAS-GFP/+;* (Fig.S2)  
*w, ey(3.5)FLP; A>y>GAL4, UAS-GFP/+; UAS-HM-pico/+*  
*w, ey(3.5)FLP; A>y>GAL4, UAS-GFP/+; UAS-Ras<sup>V12</sup>/+*  
*w, ey(3.5)FLP; A>y>GAL4, UAS-GFP/+; UAS-Ras<sup>V12</sup>, UAS-HM-pico/+*

*UAS-mCD8-GFP/+; repo-GAL4/+* (Fig.S3)  
*UAS-mCD8-GFP/+, repo-GAL4/ UAS-Ras<sup>V12</sup>*  
*UAS-mCD8-GFP/+; repo-GAL4/ UAS-HM-pico*  
*UAS-mCD8-GFP/+; repo-GAL4/ UAS-Ras<sup>V12</sup>, UAS-HM-pico*  
*UAS-mCD8-GFP/+; repo-GAL4/ UAS-Ras<sup>V12</sup>, UAS-picolR (line 4)*
